# Supplementary material for: Ultrasound-enhanced theranostics of orthotopic breast cancer through a multifunctional core–shell tecto dendrimer-based nanomedicine platform
Source: Royal Society of Chemistry journal article supplement (doi:10.1039/d3bm00375b), 2023-01-01
Supplement: d3bm00375b2.pdf [file d3bm00375b2.pdf]

Table of Contents (TOC) Image

## Ultrasound-enhanced theranostics of orthotopic breast cancer through a multifunctional core-shell tecto dendrimer-based nanomedicine platform

Junli Gong,<sup>‡a,b</sup> Cong Song,<sup>‡c</sup> Gaoming Li,<sup>b</sup> Yunqi Guo,<sup>b</sup> Zhiqiang Wang,<sup>b</sup> Honghua Guo,<sup>d</sup> Jindong Xia,<sup>d</sup> Yuchen Tao,<sup>e</sup> Qiusheng Shi,<sup>e</sup> Xiangyang Shi,<sup>\*b</sup> Mingwu Shen<sup>\*b</sup>

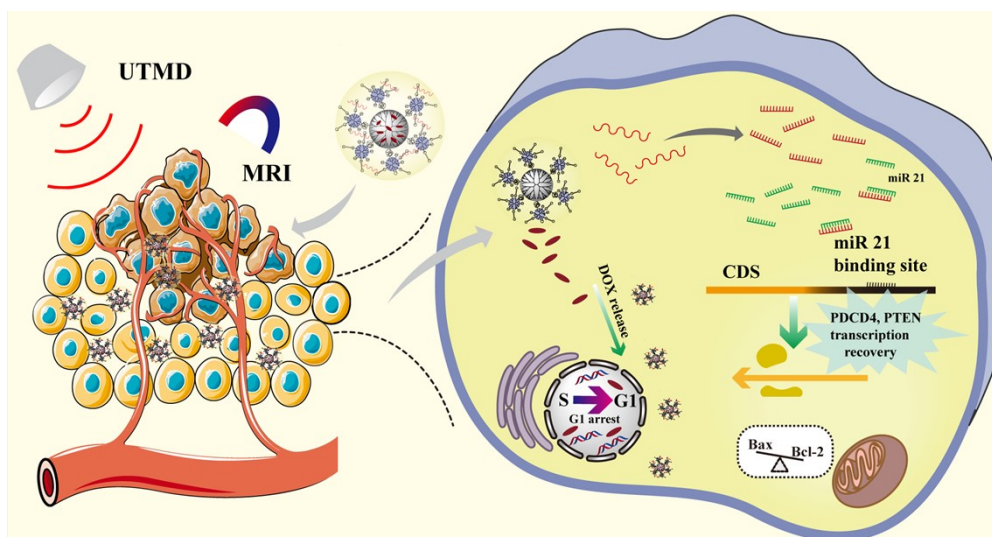

Multifunctional core-shell tecto dendrimers can be developed to co-deliver doxorubicin and microRNA 21 inhibitor for ultrasound-enhanced orthotopic breast cancer theranostics.
